# Supplementary material for: Effectiveness of COVID-19 Vaccination in Preventing All-Cause Mortality among Adults during the Third Wave of the Epidemic in Hungary: Nationwide Retrospective Cohort Study
Source: MDPI journal article supplement (doi:10.3390/vaccines10071009), 2022-06-24
Supplement: s1 [file s1]

# Effectiveness of COVID-19 Vaccination in Preventing All-Cause Mortality among Adults during the Third Wave of the Epidemic in Hungary: Nationwide Retrospective Cohort Study

Anita Pálincás<sup>1,\*</sup> and János Sándor<sup>1</sup>

**Figure S1.** Number of registered COVID-19 infections and COVID-19 caused deaths in Hungary according to the European Centre for Disease Prevention and Control reports.

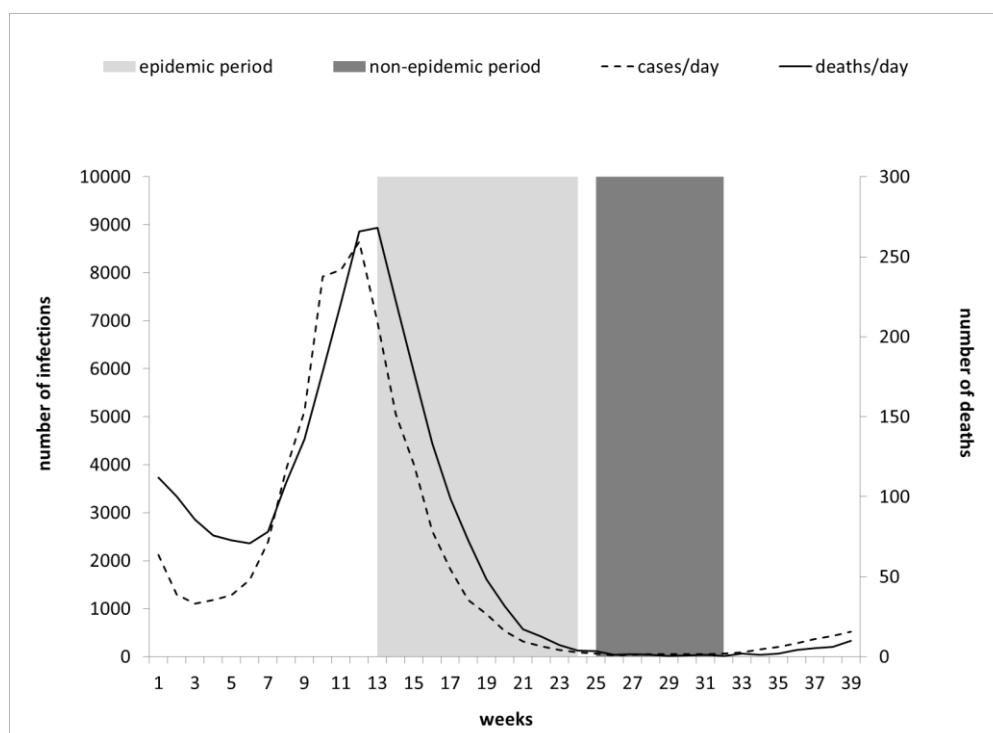

**Table S1.** Sociodemographic and clinical characteristics of adults at 1 April 2021 in Hungary by vaccination status registered in the period of 1 April 2021–20 June 2021

|                                |         | AstraZeneca     | Janssen        | Moderna         | Pfizer           | Sinopharm       | Sputnik         | p-value<br>* | Fully vaccinated | Not vaccinated   | p-value<br>** | Total            |
|--------------------------------|---------|-----------------|----------------|-----------------|------------------|-----------------|-----------------|--------------|------------------|------------------|---------------|------------------|
| Age in years, mean (±SD)       |         | 56.4 (± 13.8)   | 45.0 (± 15.7)  | 56.9 (± 18.3)   | 57.9 (± 18.3)    | 58.2 (± 18.4)   | 50.1 (± 14.7)   | < 0.001      | 55.9 (± 17.6)    | 45.6 (± 16.6)    | < 0.001       | 55.9 (± 17.6)    |
| Sex, N (%)                     | male    | 165325 (49.6%)  | 46205 (58.9%)  | 100483 (41.3%)  | 596890 (37.2%)   | 443622 (48.2%)  | 454599 (53.6%)  | < 0.001      | 1807124 (44.9%)  | 1170758 (49.2%)  | < 0.001       | 2977882 (46.5%)  |
|                                | fe-male | 168155 (50.4%)  | 32190 (41.1%)  | 142933 (58.7%)  | 1007360 (62.8%)  | 475988 (51.8%)  | 393099 (46.4%)  |              | 2219725 (55.1%)  | 1207095 (50.8%)  |               | 3426820 (53.5%)  |
| Exemption certificate, N (%)   | no      | 321200 (96.3%)  | 76466 (97.5%)  | 234819 (96.5%)  | 1542524 (96.2%)  | 889769 (96.8%)  | 837386 (98.8%)  | < 0.001      | 3902164 (96.9%)  | 2329692 (98.0%)  | < 0.001       | 6231856 (97.3%)  |
|                                | yes     | 12280 (3.7%)    | 1929 (2.5%)    | 8597 (3.5%)     | 61726 (3.8%)     | 29841 (3.2%)    | 10312 (1.2%)    |              | 124685 (3.1%)    | 48161 (2.0%)     |               | 172846 (2.7%)    |
| Diabetes mellitus, N (%)       | no      | 272960 (81.9%)  | 74787 (95.4%)  | 217545 (89.4%)  | 1425390 (88.9%)  | 812699 (88.4%)  | 803827 (94.8%)  | < 0.001      | 3607208 (89.6%)  | 2278045 (95.8%)  | < 0.001       | 5885253 (91.9%)  |
|                                | yes     | 60520 (18.1%)   | 3608 (4.6%)    | 25871 (10.6%)   | 178860 (11.1%)   | 106911 (11.6%)  | 43871 (5.2%)    |              | 419641 (10.4%)   | 99808 (4.2%)     |               | 519449 (8.1%)    |
| Ischemic heart disease, N (%)  | no      | 317706 (95.3%)  | 77358 (98.7%)  | 233734 (96.0%)  | 1534513 (95.7%)  | 884248 (96.2%)  | 835639 (98.6%)  | < 0.001      | 3883198 (96.4%)  | 2341062 (98.5%)  | < 0.001       | 6224260 (97.2%)  |
|                                | yes     | 15774 (4.7%)    | 1037 (1.3%)    | 9682 (4.0%)     | 69737 (4.3%)     | 35362 (3.8%)    | 12059 (1.4%)    |              | 143651 (3.6%)    | 36791 (1.5%)     |               | 180442 (2.8%)    |
| COPD, N (%)                    | no      | 319425 (95.8%)  | 77060 (98.3%)  | 234780 (96.5%)  | 1544896 (96.3%)  | 886993 (96.5%)  | 834795 (98.5%)  | < 0.001      | 3897949 (96.8%)  | 2337354 (98.3%)  | < 0.001       | 6235303 (97.4%)  |
|                                | yes     | 14055 (4.2%)    | 1335 (1.7%)    | 8636 (3.5%)     | 59354 (3.7%)     | 32617 (3.5%)    | 12903 (1.5%)    |              | 128900 (3.2%)    | 40499 (1.7%)     |               | 169399 (2.6%)    |
| Asthma, N (%)                  | no      | 333417 (99.98%) | 78390 (99.99%) | 243394 (99.99%) | 1604076 (99.99%) | 919546 (99.99%) | 847658 (99.99%) | < 0.001      | 4026481 (99.99%) | 2377685 (99.99%) | 0.006         | 6404166 (99.99%) |
|                                | yes     | 63 (0.02%)      | 5 (0.01%)      | 22 (0.01%)      | 174 (0.01%)      | 64 (0.01%)      | 40 (0.005%)     |              | 368 (0.01%)      | 168 (0.01%)      |               | 536 (0.01%)      |
| Hypertension, N (%)            | no      | 154980 (46.5%)  | 61114 (78.0%)  | 134964 (55.4%)  | 854979 (53.3%)   | 466203 (50.7%)  | 585604 (69.1%)  | < 0.001      | 2257844 (56.1%)  | 1892447 (79.6%)  | < 0.001       | 4150291 (64.8%)  |
|                                | yes     | 178500 (53.5%)  | 17281 (22.0%)  | 108452 (44.6%)  | 749271 (46.7%)   | 453407 (49.3%)  | 262094 (30.9%)  |              | 1769005 (43.9%)  | 485406 (20.4%)   |               | 2254411 (35.2%)  |
| Cancer, N (%)                  | no      | 314763 (94.4%)  | 77602 (99.0%)  | 231834 (95.2%)  | 1517819 (94.6%)  | 887926 (96.6%)  | 839655 (99.1%)  | < 0.001      | 3869599 (96.1%)  | 2342679 (98.5%)  | < 0.001       | 6212278 (97.0%)  |
|                                | yes     | 18717 (5.6%)    | 793 (1.0%)     | 11582 (4.8%)    | 86431 (5.4%)     | 31684 (3.4%)    | 8043 (0.9%)     |              | 157250 (3.9%)    | 35174 (1.5%)     |               | 192424 (3.0%)    |
| Chronic liver disease, N (%)   | no      | 333327 (99.95%) | 78367 (99.96%) | 243308 (99.96%) | 1603773 (99.97%) | 919399 (99.98%) | 847622 (99.99%) | < 0.001      | 4025796 (99.97%) | 2377202 (99.97%) | 0.357         | 6402998 (99.97%) |
|                                | yes     | 153 (0.05%)     | 28 (0.04%)     | 108 (0.04%)     | 477 (0.03%)      | 211 (0.02%)     | 76 (0.01%)      |              | 1053 (0.03%)     | 651 (0.03%)      |               | 1704 (0.03%)     |
| End-stage renal disease, N (%) | no      | 332490 (99.7%)  | 78357 (99.95%) | 242725 (99.7%)  | 1599375 (99.7%)  | 918529 (99.9%)  | 847581 (99.99%) | < 0.001      | 4019057 (99.8%)  | 2375987 (99.9%)  | < 0.001       | 6395044 (99.8%)  |
|                                | yes     | 990 (0.3%)      | 38 (0.05%)     | 691 (0.3%)      | 4875 (0.3%)      | 1081 (0.1%)     | 117 (0.01%)     |              | 7792 (0.2%)      | 1866 (0.1%)      |               | 9658 (0.2%)      |
| Total, N (%)                   |         | 333480 (5.2%)   | 78395 (1.2%)   | 243416 (3.8%)   | 1604250 (25.0%)  | 919610 (14.4%)  | 847698 (13.2%)  | -            | 4026849 (62.9%)  | 2377853 (37.1%)  | -             | 6404702 (100%)   |

\* t-test/ANOVA/ $\chi^2$ -test by type of vaccine

\*\* t-test/ANOVA/ $\chi^2$ -test comparing vaccinated and not vaccinated subjects

**Table S2.** Distribution of adults according to their general medical practice (GMP) characteristics by vaccination status in the period of 1 April 2021–20 June 2021

|                                         |                        | AstraZeneca     | Janssen         | Moderna         | Pfizer          | Sinopharm       | Sputnik         | p-value* | Fully vaccinated | Not vaccinated  | p-value** | Total           |
|-----------------------------------------|------------------------|-----------------|-----------------|-----------------|-----------------|-----------------|-----------------|----------|------------------|-----------------|-----------|-----------------|
| County of GMP, N (%)                    | Budapest               | 68371 (20.5%)   | 14792 (18.9%)   | 69317 (28.5%)   | 329575 (20.5%)  | 179812 (19.6%)  | 180328 (21.3%)  | < 0.001  | 842195 (20.9%)   | 314369 (13.2%)  | < 0.001   | 1156564 (18.1%) |
|                                         | Baranya                | 13223 (4.0%)    | 2639 (3.4%)     | 7879 (3.2%)     | 68285 (4.3%)    | 35189 (3.8%)    | 30519 (3.6%)    |          | 157734 (3.9%)    | 88423 (3.7%)    |           | 246157 (3.8%)   |
|                                         | Bács-Kiskun            | 16286 (4.9%)    | 4273 (5.5%)     | 10449 (4.3%)    | 79188 (4.9%)    | 46257 (5%)      | 39222 (4.6%)    |          | 195675 (4.9%)    | 143250 (6.0%)   |           | 338925 (5.3%)   |
|                                         | Békés                  | 8666 (2.6%)     | 1531 (2.0%)     | 5789 (2.4%)     | 54379 (3.4%)    | 28383 (3.1%)    | 26146 (3.1%)    |          | 124894 (3.1%)    | 94002 (4.0%)    |           | 218896 (3.4%)   |
|                                         | Borsod-Abaúj-Zemplén   | 17175 (5.2%)    | 7403 (9.4%)     | 12540 (5.2%)    | 81254 (5.1%)    | 55065 (6.0%)    | 51697 (6.1%)    |          | 225134 (5.6%)    | 190256 (8.0%)   |           | 415390 (6.5%)   |
|                                         | Csongrád-Csanád        | 12617 (3.8%)    | 4066 (5.2%)     | 7798 (3.2%)     | 67715 (4.2%)    | 39672 (4.3%)    | 32543 (3.8%)    |          | 164411 (4.1%)    | 99472 (4.2%)    |           | 263883 (4.1%)   |
|                                         | Fejér                  | 16262 (4.9%)    | 3530 (4.5%)     | 9525 (3.9%)     | 70185 (4.4%)    | 42395 (4.6%)    | 32494 (3.8%)    |          | 174391 (4.3%)    | 100159 (4.2%)   |           | 274550 (4.3%)   |
|                                         | Győr-Moson-Sopron      | 16391 (4.9%)    | 3726 (4.8%)     | 10182 (4.2%)    | 76234 (4.8%)    | 43196 (4.7%)    | 43791 (5.2%)    |          | 193520 (4.8%)    | 102212 (4.3%)   |           | 295732 (4.6%)   |
|                                         | Hajdú-Bihar            | 16798 (5%)      | 3257 (4.2%)     | 10794 (4.4%)    | 78593 (4.9%)    | 44107 (4.8%)    | 39765 (4.7%)    |          | 193314 (4.8%)    | 150225 (6.3%)   |           | 343539 (5.4%)   |
|                                         | Heves                  | 9080 (2.7%)     | 1864 (2.4%)     | 6116 (2.5%)     | 47827 (3.0%)    | 27633 (3.0%)    | 23421 (2.8%)    |          | 115941 (2.9%)    | 79651 (3.3%)    |           | 195592 (3.1%)   |
|                                         | Komárom-Esztergom      | 9140 (2.7%)     | 2130 (2.7%)     | 8382 (3.4%)     | 44685 (2.8%)    | 27864 (3.0%)    | 29997 (3.5%)    |          | 122198 (3.0%)    | 80396 (3.4%)    |           | 202594 (3.2%)   |
|                                         | Nógrád                 | 7032 (2.1%)     | 2154 (2.7%)     | 3185 (1.3%)     | 32028 (2.0%)    | 16287 (1.8%)    | 10197 (1.2%)    |          | 70883 (1.8%)     | 54669 (2.3%)    |           | 125552 (2.0%)   |
|                                         | Pest                   | 48356 (14.5%)   | 12500 (15.9%)   | 39850 (16.4%)   | 194110 (12.1%)  | 126768 (13.8%)  | 113557 (13.4%)  |          | 535141 (13.3%)   | 264386 (11.1%)  |           | 799527 (12.5%)  |
|                                         | Somogy                 | 10863 (3.3%)    | 1688 (2.2%)     | 5640 (2.3%)     | 49459 (3.1%)    | 27937 (3.0%)    | 26727 (3.2%)    |          | 122314 (3.0%)    | 77068 (3.2%)    |           | 199382 (3.1%)   |
|                                         | Szabolcs-Szatmár-Bereg | 17880 (5.4%)    | 3917 (5.0%)     | 7728 (3.2%)     | 81965 (5.1%)    | 47645 (5.2%)    | 43554 (5.1%)    |          | 202689 (5.0%)    | 151266 (6.4%)   |           | 353955 (5.5%)   |
|                                         | Jász-Nagykun-Szolnok   | 10722 (3.2%)    | 2467 (3.1%)     | 6361 (2.6%)     | 54806 (3.4%)    | 31787 (3.5%)    | 27160 (3.2%)    |          | 133303 (3.3%)    | 117277 (4.9%)   |           | 250580 (3.9%)   |
|                                         | Tolna                  | 7398 (2.2%)     | 1285 (1.6%)     | 4571 (1.9%)     | 40613 (2.5%)    | 20272 (2.2%)    | 17810 (2.1%)    |          | 91949 (2.3%)     | 53942 (2.3%)    |           | 145891 (2.3%)   |
|                                         | Vas                    | 7965 (2.4%)     | 1112 (1.4%)     | 5098 (2.1%)     | 45892 (2.9%)    | 24579 (2.7%)    | 22187 (2.6%)    |          | 106833 (2.7%)    | 60971 (2.6%)    |           | 167804 (2.6%)   |
|                                         | Veszprém               | 10146 (3%)      | 2356 (3.0%)     | 6856 (2.8%)     | 59174 (3.7%)    | 29308 (3.2%)    | 31907 (3.8%)    |          | 139747 (3.5%)    | 88677 (3.7%)    |           | 228424 (3.6%)   |
|                                         | Zala                   | 9109 (2.7%)     | 1705 (2.2%)     | 5356 (2.2%)     | 48283 (3.0%)    | 25454 (2.8%)    | 24676 (2.9%)    |          | 114583 (2.8%)    | 67182 (2.8%)    |           | 181765 (2.8%)   |
| Size of GMP, N (%)                      | ≤ 800 patients         | 6226 (1.9%)     | 1705 (2.2%)     | 4913 (2.0%)     | 38440 (2.4%)    | 21129 (2.3%)    | 16449 (1.9%)    | < 0.001  | 88862 (2.2%)     | 57006 (2.4%)    | < 0.001   | 145868 (2.3%)   |
|                                         | 801-1200 patients      | 33905 (10.2%)   | 8990 (11.5%)    | 23632 (9.7%)    | 181525 (11.3%)  | 111371 (12.1%)  | 87804 (10.4%)   |          | 447227 (11.1%)   | 291574 (12.3%)  |           | 738801 (11.5%)  |
|                                         | 1201-1600 patients     | 95726 (28.7%)   | 23319 (29.7%)   | 67455 (27.7%)   | 468837 (29.2%)  | 271817 (29.6%)  | 247325 (29.2%)  |          | 1174479 (29.2%)  | 713646 (30.0%)  |           | 1888125 (29.5%) |
|                                         | 1601-2000 patients     | 101766 (30.5%)  | 23485 (30.0%)   | 76553 (31.4%)   | 481614 (30.0%)  | 273011 (29.7%)  | 257969 (30.4%)  |          | 1214398 (30.2%)  | 702408 (29.5%)  |           | 1916806 (29.9%) |
|                                         | > 2000 patients        | 95857 (28.7%)   | 20896 (26.7%)   | 70863 (29.1%)   | 433834 (27.0%)  | 242282 (26.3%)  | 238151 (28.1%)  |          | 1101883 (27.4%)  | 613219 (25.8%)  |           | 1715102 (26.8%) |
| Settlement type of GMP, N (%)           | rural                  | 79897 (24.0%)   | 27431 (35.0%)   | 52005 (21.4%)   | 388090 (24.2%)  | 252014 (27.4%)  | 206877 (24.4%)  | < 0.001  | 1006314 (25.0%)  | 750438 (31.6%)  | < 0.001   | 1756752 (27.4%) |
|                                         | urban                  | 253583 (76.0%)  | 50964 (65.0%)   | 191411 (78.6%)  | 1216160 (75.8%) | 667596 (72.6%)  | 640821 (75.6%)  |          | 3020535 (75.0%)  | 1627415 (68.4%) |           | 4647950 (72.6%) |
| Age and sex of GP, N (%)                | < 65 years male        | 102389 (30.7%)  | 24050 (30.7%)   | 72633 (29.8%)   | 479111 (29.9%)  | 277257 (30.1%)  | 256132 (30.2%)  | < 0.001  | 1211572 (30.1%)  | 740118 (31.1%)  | < 0.001   | 1951690 (30.5%) |
|                                         | < 65 years female      | 113511 (34.0%)  | 24472 (31.2%)   | 88363 (36.3%)   | 545213 (34.0%)  | 298775 (32.5%)  | 291999 (34.4%)  |          | 1362333 (33.8%)  | 742381 (31.2%)  |           | 2104714 (32.9%) |
|                                         | ≥ 65 years male        | 53426 (16.0%)   | 13227 (16.9%)   | 36292 (14.9%)   | 253513 (15.8%)  | 155240 (16.9%)  | 133380 (15.7%)  |          | 645078 (16.0%)   | 399494 (16.8%)  |           | 1044572 (16.3%) |
|                                         | ≥ 65 years female      | 47724 (14.3%)   | 9933 (12.7%)    | 35393 (14.5%)   | 234420 (14.6%)  | 130406 (14.2%)  | 120627 (14.2%)  |          | 578503 (14.4%)   | 299578 (12.6%)  |           | 878081 (13.7%)  |
|                                         | vacant                 | 16430 (4.9%)    | 6713 (8.6%)     | 10735 (4.4%)    | 91993 (5.7%)    | 57932 (6.3%)    | 45560 (5.4%)    |          | 229363 (5.7%)    | 196282 (8.3%)   |           | 425645 (6.6%)   |
| Relative education for GMP, mean (±SD)  |                        | 1.007 (± 0.077) | 0.982 (± 0.089) | 1.017 (± 0.078) | 1.006 (± 0.079) | 0.999 (± 0.081) | 1.007 (± 0.077) | < 0.001  | 1.005 (± 0.079)  | 0.979 (± 0.082) | < 0.001   | 1.005 (± 0.079) |
| Relative employment for GMP, mean (±SD) |                        | 1.010 (± 0.100) | 0.979 (± 0.132) | 1.022 (± 0.095) | 1.007 (± 0.103) | 1.001 (± 0.108) | 1.011 (± 0.100) | < 0.001  | 1.007 (± 0.103)  | 0.976 (± 0.120) | < 0.001   | 1.007 (± 0.103) |
| Total. N (%)                            |                        | 333480 (5.2%)   | 78395 (1.2%)    | 243416 (3.8%)   | 1604250 (25.0%) | 919610 (14.4%)  | 847698 (13.2%)  | -        | 4026849 (62.9%)  | 2377853 (37.1%) | -         | 6404702 (100%)  |

\* t-test/ANOVA/ $\chi^2$ -test by type of vaccine

\*\* t-test/ANOVA/ $\chi^2$ -test comparing vaccinated and not vaccinated subjects

**Table S3.** Sociodemographic and clinical characteristics of adults at 21 June 2021 in Hungary by vaccination status registered in the period of 21 June 2021–15 August 2021

|                                |        | AstraZeneca     | Janssen        | Moderna         | Pfizer           | Sinopharm       | Sputnik         | p-value* | Fully vaccinated | Not vaccinated   | p-value** | Total            |
|--------------------------------|--------|-----------------|----------------|-----------------|------------------|-----------------|-----------------|----------|------------------|------------------|-----------|------------------|
| Age in years, mean (±SD)       |        | 53.0 (± 14.9)   | 44.6 (± 15.6)  | 54.5 (± 18.3)   | 53.8 (± 18.9)    | 57.3 (± 18.6)   | 49.9 (± 14.8)   | < 0.001  | 53.6 (± 17.8)    | 45.5 (± 16.5)    | < 0.001   | 51.1 (± 17.8)    |
| Sex, N (%)                     | male   | 311473 (52.5%)  | 57560 (58.4%)  | 136173 (42.3%)  | 840773 (39.5%)   | 474909 (48.5%)  | 465633 (53.7%)  | < 0.001  | 2286521 (45.8%)  | 1098801 (49.4%)  | < 0.001   | 3385322 (46.9%)  |
|                                | female | 281928 (47.5%)  | 40994 (41.6%)  | 185802 (57.7%)  | 1288669 (60.5%)  | 504533 (51.5%)  | 401164 (46.3%)  |          | 2703090 (54.2%)  | 1127378 (50.6%)  |           | 3830468 (53.1%)  |
| Exemption certificate, N (%)   | no     | 575425 (97.0%)  | 96194 (97.6%)  | 311222 (96.7%)  | 2059265 (96.7%)  | 948327 (96.8%)  | 856332 (98.8%)  | < 0.001  | 4846765 (97.1%)  | 2182314 (98.0%)  | < 0.001   | 7029079 (97.4%)  |
|                                | yes    | 17976 (3.0%)    | 2360 (2.4%)    | 10753 (3.3%)    | 70177 (3.3%)     | 31115 (3.2%)    | 10465 (1.2%)    |          | 142846 (2.9%)    | 43865 (2.0%)     |           | 186711 (2.6%)    |
| Diabetes mellitus, N (%)       | no     | 515935 (86.9%)  | 94232 (95.6%)  | 290920 (90.4%)  | 1929423 (90.6%)  | 870651 (88.9%)  | 822541 (94.9%)  | < 0.001  | 4523702 (90.7%)  | 2136134 (96.0%)  | < 0.001   | 6659836 (92.3%)  |
|                                | yes    | 77466 (13.1%)   | 4322 (4.4%)    | 31055 (9.6%)    | 200019 (9.4%)    | 108791 (11.1%)  | 44256 (5.1%)    |          | 465909 (9.3%)    | 90045 (4.0%)     |           | 555954 (7.7%)    |
| Ischemic heart disease, N (%)  | no     | 573125 (96.6%)  | 97297 (98.7%)  | 310635 (96.5%)  | 2053804 (96.4%)  | 943542 (96.3%)  | 854646 (98.6%)  | < 0.001  | 4833049 (96.9%)  | 2193181 (98.5%)  | < 0.001   | 7026230 (97.4%)  |
|                                | yes    | 20276 (3.4%)    | 1257 (1.3%)    | 11340 (3.5%)    | 75638 (3.6%)     | 35900 (3.7%)    | 12151 (1.4%)    |          | 156562 (3.1%)    | 32998 (1.5%)     |           | 189560 (2.6%)    |
| COPD, N (%)                    | no     | 574127 (96.8%)  | 96905 (98.3%)  | 311517 (96.8%)  | 2062925 (96.9%)  | 946011 (96.6%)  | 853782 (98.5%)  | < 0.001  | 4845267 (97.1%)  | 2189777 (98.4%)  | < 0.001   | 7035044 (97.5%)  |
|                                | yes    | 19274 (3.2%)    | 1649 (1.7%)    | 10458 (3.2%)    | 66517 (3.1%)     | 33431 (3.4%)    | 13015 (1.5%)    |          | 144344 (2.9%)    | 36402 (1.6%)     |           | 180746 (2.5%)    |
| Asthma, N (%)                  | no     | 593319 (99.99%) | 98549 (99.99%) | 321944 (99.99%) | 2129217 (99.99%) | 979374 (99.99%) | 866755 (99.99%) | < 0.001  | 4989158 (99.99%) | 2226045 (99.99%) | < 0.001   | 7215203 (99.99%) |
|                                | yes    | 82 (0.01%)      | 5 (0.01%)      | 31 (0.01%)      | 225 (0.01%)      | 68 (0.01%)      | 42 (0.005%)     |          | 453 (0.01%)      | 134 (0.01%)      |           | 587 (0.01%)      |
| Hypertension, N (%)            | no     | 336984 (56.8%)  | 77802 (78.9%)  | 191286 (59.4%)  | 1281562 (60.2%)  | 515006 (52.6%)  | 602182 (69.5%)  | < 0.001  | 3004822 (60.2%)  | 1782685 (80.1%)  | < 0.001   | 4787507 (66.3%)  |
|                                | yes    | 256417 (43.2%)  | 20752 (21.1%)  | 130689 (40.6%)  | 847880 (39.8%)   | 464436 (47.4%)  | 264615 (30.5%)  |          | 1984789 (39.8%)  | 443494 (19.9%)   |           | 2428283 (33.7%)  |
| Cancer, N (%)                  | no     | 570528 (96.1%)  | 97591 (99.0%)  | 308552 (95.8%)  | 2034115 (95.5%)  | 947378 (96.7%)  | 858680 (99.1%)  | < 0.001  | 4816844 (96.5%)  | 2196777 (98.7%)  | < 0.001   | 7013621 (97.2%)  |
|                                | yes    | 22873 (3.9%)    | 963 (1.0%)     | 13423 (4.2%)    | 95327 (4.5%)     | 32064 (3.3%)    | 8117 (0.9%)     |          | 172767 (3.5%)    | 29402 (1.3%)     |           | 202169 (2.8%)    |
| Chronic liver disease, N (%)   | no     | 593185 (99.96%) | 98515 (99.96%) | 321840 (99.96%) | 2128846 (99.97%) | 979221 (99.98%) | 866718 (99.99%) | < 0.001  | 4988325 (99.97%) | 2225695 (99.98%) | 0.001     | 7214020 (99.98%) |
|                                | yes    | 216 (0.04%)     | 39 (0.04%)     | 135 (0.04%)     | 596 (0.03%)      | 221 (0.02%)     | 79 (0.01%)      |          | 1286 (0.03%)     | 484 (0.02%)      |           | 1770 (0.02%)     |
| End-stage renal disease, N (%) | no     | 592225 (99.8%)  | 98509 (99.95%) | 321175 (99.8%)  | 2124155 (99.8%)  | 978360 (99.9%)  | 866676 (99.99%) | < 0.001  | 4981100 (99.8%)  | 2224754 (99.9%)  | < 0.001   | 7205854 (99.9%)  |
|                                | yes    | 1176 (0.2%)     | 45 (0.05%)     | 800 (0.2%)      | 5287 (0.2%)      | 1082 (0.1%)     | 121 (0.01%)     |          | 8511 (0.2%)      | 1425 (0.1%)      |           | 9936 (0.1%)      |
| Total, N (%)                   |        | 593401 (8.2%)   | 98554 (1.4%)   | 321975 (4.5%)   | 2129442 (29.5%)  | 979442 (13.6%)  | 866797 (12%)    | -        | 4989611 (69.1%)  | 2226179 (30.9%)  | -         | 7215790 (100%)   |

\* t-test/ANOVA/ $\chi^2$ -test by type of vaccine

\*\* t-test/ANOVA/ $\chi^2$ -test comparing vaccinated and not vaccinated subjects

**Table S4.** Distribution of adults of vaccination cohorts by their general medical practice (GMP) characteristics in the period of 21 June 2021–15 August 2021

|                                         |                        | AstraZeneca     | Janssen         | Moderna         | Pfizer          | Sinopharm       | Sputnik         | p-value* | Fully vaccinated | Not vaccinated  | p-value** | Total           |
|-----------------------------------------|------------------------|-----------------|-----------------|-----------------|-----------------|-----------------|-----------------|----------|------------------|-----------------|-----------|-----------------|
| County of GMP, N (%)                    | Budapest               | 130173 (21.9%)  | 18310 (18.6%)   | 90643 (28.2%)   | 436521 (20.5%)  | 190139 (19.4%)  | 183106 (21.1%)  | < 0.001  | 1048892 (21%)    | 289766 (13.0%)  | < 0.001   | 1338658 (18.6%) |
|                                         | Baranya                | 22211 (3.7%)    | 3263 (3.3%)     | 9674 (3.0%)     | 84181 (4.0%)    | 37256 (3.8%)    | 31023 (3.6%)    |          | 187608 (3.8%)    | 83180 (3.7%)    |           | 270788 (3.8%)   |
|                                         | Bács-Kiskun            | 28465 (4.8%)    | 5404 (5.5%)     | 14693 (4.6%)    | 99804 (4.7%)    | 49025 (5.0%)    | 40314 (4.7%)    |          | 237705 (4.8%)    | 135466 (6.1%)   |           | 373171 (5.2%)   |
|                                         | Békés                  | 18405 (3.1%)    | 2335 (2.4%)     | 6685 (2.1%)     | 73658 (3.5%)    | 29792 (3.0%)    | 26628 (3.1%)    |          | 157503 (3.2%)    | 89013 (4%)      |           | 246516 (3.4%)   |
|                                         | Borsod-Abaúj-Zemplén   | 36390 (6.1%)    | 9454 (9.6%)     | 17197 (5.3%)    | 111992 (5.3%)   | 58624 (6.0%)    | 53197 (6.1%)    |          | 286854 (5.7%)    | 179409 (8.1%)   |           | 466263 (6.5%)   |
|                                         | Csongrád-Csanád        | 23899 (4.0%)    | 4897 (5%)       | 10337 (3.2%)    | 89774 (4.2%)    | 41572 (4.2%)    | 33267 (3.8%)    |          | 203746 (4.1%)    | 93082 (4.2%)    |           | 296828 (4.1%)   |
|                                         | Fejér                  | 26802 (4.5%)    | 4340 (4.4%)     | 12546 (3.9%)    | 94968 (4.5%)    | 45146 (4.6%)    | 33671 (3.9%)    |          | 217473 (4.4%)    | 93248 (4.2%)    |           | 310721 (4.3%)   |
|                                         | Győr-Moson-Sopron      | 31726 (5.3%)    | 4915 (5.0%)     | 13643 (4.2%)    | 106469 (5.0%)   | 45575 (4.7%)    | 44685 (5.2%)    |          | 247013 (5%)      | 93835 (4.2%)    |           | 340848 (4.7%)   |
|                                         | Hajdú-Bihar            | 27289 (4.6%)    | 3895 (4.0%)     | 14205 (4.4%)    | 104841 (4.9%)   | 46877 (4.8%)    | 41056 (4.7%)    |          | 238163 (4.8%)    | 142104 (6.4%)   |           | 380267 (5.3%)   |
|                                         | Heves                  | 16273 (2.7%)    | 2261 (2.3%)     | 7043 (2.2%)     | 65685 (3.1%)    | 29407 (3.0%)    | 23859 (2.8%)    |          | 144528 (2.9%)    | 74902 (3.4%)    |           | 219430 (3%)     |
|                                         | Komárom-Esztergom      | 18195 (3.1%)    | 2896 (2.9%)     | 10815 (3.4%)    | 62858 (3.0%)    | 29926 (3.1%)    | 30750 (3.5%)    |          | 155440 (3.1%)    | 74984 (3.4%)    |           | 230424 (3.2%)   |
|                                         | Nógrád                 | 11375 (1.9%)    | 2572 (2.6%)     | 4302 (1.3%)     | 41940 (2.0%)    | 18290 (1.9%)    | 10557 (1.2%)    |          | 89036 (1.8%)     | 50919 (2.3%)    |           | 139955 (1.9%)   |
|                                         | Pest                   | 78207 (13.2%)   | 15512 (15.7%)   | 53085 (16.5%)   | 255361 (12.0%)  | 135285 (13.8%)  | 116670 (13.5%)  |          | 654120 (13.1%)   | 246278 (11.1%)  |           | 900398 (12.5%)  |
|                                         | Somogy                 | 14826 (2.5%)    | 2232 (2.3%)     | 7487 (2.3%)     | 64828 (3.0%)    | 29431 (3.0%)    | 27261 (3.1%)    |          | 146065 (2.9%)    | 71896 (3.2%)    |           | 217961 (3.0%)   |
|                                         | Szabolcs-Szatmár-Bereg | 27184 (4.6%)    | 5033 (5.1%)     | 11921 (3.7%)    | 112669 (5.3%)   | 52972 (5.4%)    | 44630 (5.1%)    |          | 254409 (5.1%)    | 140911 (6.3%)   |           | 395320 (5.5%)   |
|                                         | Jász-Nagykun-Szolnok   | 16694 (2.8%)    | 3074 (3.1%)     | 9124 (2.8%)     | 71851 (3.4%)    | 35169 (3.6%)    | 27825 (3.2%)    |          | 163737 (3.3%)    | 111141 (5.0%)   |           | 274878 (3.8%)   |
|                                         | Tolna                  | 11497 (1.9%)    | 1857 (1.9%)     | 5522 (1.7%)     | 52947 (2.5%)    | 21545 (2.2%)    | 18141 (2.1%)    |          | 111509 (2.2%)    | 51359 (2.3%)    |           | 162868 (2.3%)   |
|                                         | Vas                    | 16075 (2.7%)    | 1359 (1.4%)     | 6809 (2.1%)     | 61192 (2.9%)    | 26075 (2.7%)    | 22587 (2.6%)    |          | 134097 (2.7%)    | 57394 (2.6%)    |           | 191491 (2.7%)   |
|                                         | Veszprém               | 21206 (3.6%)    | 2950 (3.0%)     | 9237 (2.9%)     | 76267 (3.6%)    | 30518 (3.1%)    | 32570 (3.8%)    |          | 172748 (3.5%)    | 83847 (3.8%)    |           | 256595 (3.6%)   |
|                                         | Zala                   | 16509 (2.8%)    | 1995 (2.0%)     | 7007 (2.2%)     | 61636 (2.9%)    | 26818 (2.7%)    | 25000 (2.9%)    |          | 138965 (2.8%)    | 63445 (2.8%)    |           | 202410 (2.8%)   |
| Size of GMP, N (%)                      | ≤ 800 patients         | 10652 (1.8%)    | 2186 (2.2%)     | 6288 (2.0%)     | 48797 (2.3%)    | 22588 (2.3%)    | 16866 (1.9%)    | < 0.001  | 107377 (2.2%)    | 53467 (2.4%)    | < 0.001   | 160844 (2.2%)   |
|                                         | 801-1200 patients      | 58711 (9.9%)    | 11260 (11.4%)   | 31045 (9.6%)    | 237267 (11.1%)  | 118862 (12.1%)  | 89853 (10.4%)   |          | 546998 (11%)     | 274038 (12.3%)  |           | 821036 (11.4%)  |
|                                         | 1201-1600 patients     | 169218 (28.5%)  | 29327 (29.8%)   | 89659 (27.8%)   | 620499 (29.1%)  | 289175 (29.5%)  | 252599 (29.1%)  |          | 1450477 (29.1%)  | 669339 (30.1%)  |           | 2119816 (29.4%) |
|                                         | 1601-2000 patients     | 182838 (30.8%)  | 29346 (29.8%)   | 100788 (31.3%)  | 640859 (30.1%)  | 290401 (29.6%)  | 263658 (30.4%)  |          | 1507890 (30.2%)  | 656987 (29.5%)  |           | 2164877 (30.0%) |
|                                         | > 2000 patients        | 171982 (29.0%)  | 26435 (26.8%)   | 94195 (29.3%)   | 582020 (27.3%)  | 258416 (26.4%)  | 243821 (28.1%)  |          | 1376869 (27.6%)  | 572348 (25.7%)  |           | 1949217 (27.0%) |
| Settlement type of GMP, N (%)           | rural                  | 140995 (23.8%)  | 34232 (34.7%)   | 72814 (22.6%)   | 524822 (24.6%)  | 272299 (27.8%)  | 212680 (24.5%)  | < 0.001  | 1257842 (25.2%)  | 704027 (31.6%)  | < 0.001   | 1961869 (27.2%) |
|                                         | urban                  | 452406 (76.2%)  | 64322 (65.3%)   | 249161 (77.4%)  | 1604620 (75.4%) | 707143 (72.2%)  | 654117 (75.5%)  |          | 3731769 (74.8%)  | 1522152 (68.4%) |           | 5253921 (72.8%) |
| Age and sex of GP, N (%)                | < 65 years male        | 184107 (31.0%)  | 30396 (30.8%)   | 95885 (29.8%)   | 639075 (30.0%)  | 296075 (30.2%)  | 262426 (30.3%)  | < 0.001  | 1507964 (30.2%)  | 693791 (31.2%)  | < 0.001   | 2201755 (30.5%) |
|                                         | < 65 years female      | 203694 (34.3%)  | 30664 (31.1%)   | 115206 (35.8%)  | 721676 (33.9%)  | 317205 (32.4%)  | 298047 (34.4%)  |          | 1686492 (33.8%)  | 693632 (31.2%)  |           | 2380124 (33.0%) |
|                                         | ≥ 65 years male        | 93374 (15.7%)   | 16565 (16.8%)   | 48261 (15.0%)   | 337331 (15.8%)  | 165666 (16.9%)  | 136519 (15.7%)  |          | 797716 (16%)     | 374404 (16.8%)  |           | 1172120 (16.2%) |
|                                         | ≥ 65 years female      | 83174 (14%)     | 12160 (12.3%)   | 47075 (14.6%)   | 307101 (14.4%)  | 138010 (14.1%)  | 122929 (14.2%)  |          | 710449 (14.2%)   | 279432 (12.6%)  |           | 989881 (13.7%)  |
|                                         | vacant                 | 29052 (4.9%)    | 8769 (8.9%)     | 15548 (4.8%)    | 124259 (5.8%)   | 62486 (6.4%)    | 46876 (5.4%)    |          | 286990 (5.8%)    | 184920 (8.3%)   |           | 471910 (6.5%)   |
| Relative education for GMP, mean (±SD)  |                        | 1.009 (± 0.077) | 0.981 (± 0.089) | 1.014 (± 0.080) | 1.004 (± 0.079) | 0.998 (± 0.081) | 1.006 (± 0.077) | < 0.001  | 1.004 (± 0.079)  | 0.978 (± 0.082) | < 0.001   | 0.996 (± 0.081) |
| Relative employment for GMP, mean (±SD) |                        | 1.013 (± 0.099) | 0.977 (± 0.134) | 1.018 (± 0.099) | 1.006 (± 0.104) | 0.999 (± 0.110) | 1.011 (± 0.100) | < 0.001  | 1.007 (± 0.104)  | 0.975 (± 0.120) | < 0.001   | 0.997 (± 0.110) |
| Total, N (%)                            |                        | 593401 (8.2%)   | 98554 (1.4%)    | 321975 (4.5%)   | 2129442 (29.5%) | 979442 (13.6%)  | 866797 (12%)    | -        | 4989611 (69.1%)  | 2226179 (30.9%) | -         | 7215790 (100%)  |

\* t-test/ANOVA/ $\chi^2$ -test by type of vaccine

\*\* t-test/ANOVA/ $\chi^2$ -test comparing vaccinated and not vaccinated subjects

**Table S5** Application of different vaccines among patients with chronic diseases.

|                                               |                         | AstraZeneca    | Janssen      | Moderna       | Pfizer         | Sinopharm      | Sputnik        | None           | Total          |
|-----------------------------------------------|-------------------------|----------------|--------------|---------------|----------------|----------------|----------------|----------------|----------------|
| Number of patients in epidemic period (%)     | Diabetes mellitus       | 60520 (11.7%)  | 3608 (0.7%)  | 25871 (5.0%)  | 178860 (34.4%) | 106911 (20.6%) | 43871 (8.4%)   | 99808 (19.2%)  | 519449 (100%)  |
|                                               | Ischemic heart disease  | 15774 (8.7%)   | 1037 (0.6%)  | 9682 (5.4%)   | 69737 (38.6%)  | 35362 (19.6%)  | 12059 (6.7%)   | 36791 (20.4%)  | 180442 (100%)  |
|                                               | COPD                    | 14055 (8.3%)   | 1335 (0.8%)  | 8636 (5.1%)   | 59354 (35.0%)  | 32617 (19.3%)  | 12903 (7.6%)   | 40499 (23.9%)  | 169399 (100%)  |
|                                               | Asthma                  | 63 (11.8%)     | 5 (0.9%)     | 22 (4.1%)     | 174 (32.5%)    | 64 (11.9%)     | 40 (7.5%)      | 168 (31.3%)    | 536 (100%)     |
|                                               | Hypertension            | 178500 (7.9%)  | 17281 (0.8%) | 108452 (4.8%) | 749271 (33.2%) | 453407 (20.1%) | 262094 (11.6%) | 485406 (21.5%) | 2254411 (100%) |
|                                               | Cancer                  | 18717 (9.7%)   | 793 (0.4%)   | 11582 (6.0%)  | 86431 (44.9%)  | 31684 (16.5%)  | 8043 (4.2%)    | 35174 (18.3%)  | 192424 (100%)  |
|                                               | Chronic liver disease   | 153 (9.0%)     | 28 (1.6%)    | 108 (6.3%)    | 477 (28.0%)    | 211 (12.4%)    | 76 (4.5%)      | 651 (38.2%)    | 1704 (100%)    |
|                                               | End-stage renal disease | 990 (10.3%)    | 38 (0.4%)    | 691 (7.2%)    | 4875 (50.5%)   | 1081 (11.2%)   | 117 (1.2%)     | 1866 (19.3%)   | 9658 (100%)    |
| Number of patients in non-epidemic period (%) | Diabetes mellitus       | 77466 (13.9%)  | 4322 (0.8%)  | 31055 (5.6%)  | 200019 (36.0%) | 108791 (19.6%) | 44256 (8.0%)   | 90045 (16.2%)  | 555954 (100%)  |
|                                               | Ischemic heart disease  | 20276 (10.7%)  | 1257 (0.7%)  | 11340 (6%)    | 75638 (39.9%)  | 35900 (18.9%)  | 12151 (6.4%)   | 32998 (17.4%)  | 189560 (100%)  |
|                                               | COPD                    | 19274 (10.7%)  | 1649 (0.9%)  | 10458 (5.8%)  | 66517 (36.8%)  | 33431 (18.5%)  | 13015 (7.2%)   | 36402 (20.1%)  | 180746 (100%)  |
|                                               | Asthma                  | 82 (14%)       | 5 (0.9%)     | 31 (5.3%)     | 225 (38.3%)    | 68 (11.6%)     | 42 (7.2%)      | 134 (22.8%)    | 587 (100%)     |
|                                               | Hypertension            | 256417 (10.6%) | 20752 (0.9%) | 130689 (5.4%) | 847880 (34.9%) | 464436 (19.1%) | 264615 (10.9%) | 443494 (18.3%) | 2428283 (100%) |
|                                               | Cancer                  | 22873 (11.3%)  | 963 (0.5%)   | 13423 (6.6%)  | 95327 (47.2%)  | 32064 (15.9%)  | 8117 (4.0%)    | 29402 (14.5%)  | 202169 (100%)  |
|                                               | Chronic liver disease   | 216 (12.2%)    | 39 (2.2%)    | 135 (7.6%)    | 596 (33.7%)    | 221 (12.5%)    | 79 (4.5%)      | 484 (27.3%)    | 1770 (100%)    |
|                                               | End-stage renal disease | 1176 (11.8%)   | 45 (0.5%)    | 800 (8.1%)    | 5287 (53.2%)   | 1082 (10.9%)   | 121 (1.2%)     | 1425 (14.3%)   | 9936 (100%)    |

**Table S6.** Mortality risk reduction among vaccinated adults by Cox proportional hazards regression models between 1 April 2021 and 20 June 2021 (adjusted hazard ratios with corresponding 95% confidence intervals, significant results in bold) in Hungary

|                                                |                        | AstraZeneca              | Janssen                  | Moderna                  | Pfizer                   | Sinopharm                | Sputnik                  |
|------------------------------------------------|------------------------|--------------------------|--------------------------|--------------------------|--------------------------|--------------------------|--------------------------|
| Vaccination                                    | Fully / Not vaccinated | 0.129 [0.111 - 0.150]    | 0.174 [0.118 - 0.255]    | 0.187 [0.173 - 0.202]    | 0.197 [0.190 - 0.203]    | 0.147 [0.140 - 0.154]    | 0.098 [0.088 - 0.108]    |
| Age in years                                   |                        | 1.089 [1.088 - 1.090]    | 1.089 [1.088 - 1.091]    | 1.090 [1.089 - 1.091]    | 1.091 [1.090 - 1.092]    | 1.091 [1.090 - 1.092]    | 1.090 [1.089 - 1.091]    |
| Sex                                            | Female / Male          | 0.567 [0.550 - 0.584]    | 0.568 [0.551 - 0.585]    | 0.571 [0.555 - 0.589]    | 0.602 [0.586 - 0.618]    | 0.560 [0.545 - 0.577]    | 0.565 [0.548 - 0.582]    |
| Exemption certificate                          | Yes / No               | 1.635 [1.547 - 1.726]    | 1.622 [1.535 - 1.714]    | 1.615 [1.530 - 1.705]    | 1.656 [1.578 - 1.737]    | 1.591 [1.509 - 1.677]    | 1.622 [1.535 - 1.713]    |
| Diabetes mellitus                              | Yes / No               | 1.423 [1.369 - 1.480]    | 1.424 [1.370 - 1.481]    | 1.420 [1.367 - 1.476]    | 1.387 [1.341 - 1.435]    | 1.440 [1.389 - 1.493]    | 1.426 [1.372 - 1.481]    |
| Ischemic heart disease                         | Yes / No               | 1.466 [1.394 - 1.542]    | 1.464 [1.391 - 1.540]    | 1.457 [1.386 - 1.531]    | 1.420 [1.359 - 1.484]    | 1.477 [1.409 - 1.549]    | 1.478 [1.405 - 1.554]    |
| COPD                                           | Yes / No               | 1.677 [1.593 - 1.766]    | 1.672 [1.588 - 1.762]    | 1.677 [1.594 - 1.765]    | 1.681 [1.607 - 1.759]    | 1.714 [1.632 - 1.800]    | 1.679 [1.595 - 1.768]    |
| Asthma                                         | Yes / No               | 3.418 [2.020 - 5.784]    | 3.423 [2.023 - 5.791]    | 3.268 [1.931 - 5.528]    | 3.077 [1.852 - 5.113]    | 3.706 [2.266 - 6.062]    | 3.416 [2.019 - 5.780]    |
| Hypertension                                   | Yes / No               | 1.341 [1.294 - 1.389]    | 1.340 [1.294 - 1.388]    | 1.331 [1.285 - 1.378]    | 1.255 [1.215 - 1.296]    | 1.302 [1.258 - 1.346]    | 1.336 [1.290 - 1.384]    |
| Cancer                                         | Yes / No               | 4.629 [4.449 - 4.816]    | 4.649 [4.467 - 4.837]    | 4.470 [4.298 - 4.649]    | 3.726 [3.595 - 3.862]    | 4.249 [4.090 - 4.415]    | 4.607 [4.428 - 4.793]    |
| Chronic liver disease                          | Yes / No               | 13.021 [10.850 - 15.625] | 12.953 [10.777 - 15.568] | 13.374 [11.170 - 16.012] | 12.941 [10.850 - 15.435] | 12.997 [10.856 - 15.559] | 13.007 [10.831 - 15.621] |
| End-stage renal disease                        | Yes / No               | 4.123 [3.666 - 4.638]    | 4.005 [3.553 - 4.516]    | 3.950 [3.514 - 4.441]    | 3.574 [3.222 - 3.965]    | 4.223 [3.772 - 4.727]    | 3.994 [3.543 - 4.502]    |
| Location of GMP by county (reference Budapest) | Baranya                | 0.988 [0.904 - 1.079]    | 0.991 [0.907 - 1.083]    | 0.989 [0.906 - 1.079]    | 1.018 [0.942 - 1.100]    | 1.009 [0.928 - 1.097]    | 0.995 [0.911 - 1.086]    |
|                                                | Bács-Kiskun            | 0.944 [0.870 - 1.024]    | 0.947 [0.873 - 1.028]    | 0.952 [0.878 - 1.031]    | 0.969 [0.901 - 1.043]    | 0.958 [0.887 - 1.035]    | 0.952 [0.878 - 1.032]    |
|                                                | Békés                  | 0.958 [0.877 - 1.046]    | 0.955 [0.874 - 1.044]    | 0.959 [0.879 - 1.046]    | 1.023 [0.946 - 1.106]    | 0.950 [0.873 - 1.034]    | 0.952 [0.872 - 1.040]    |
|                                                | Borsod-Abaúj-Zemplén   | 1.019 [0.943 - 1.101]    | 1.016 [0.940 - 1.098]    | 1.023 [0.948 - 1.104]    | 1.064 [0.992 - 1.141]    | 1.018 [0.945 - 1.096]    | 1.020 [0.945 - 1.102]    |
|                                                | Csongrád-Csanád        | 0.933 [0.857 - 1.016]    | 0.937 [0.861 - 1.020]    | 0.945 [0.869 - 1.028]    | 0.984 [0.913 - 1.060]    | 0.937 [0.865 - 1.016]    | 0.943 [0.867 - 1.025]    |
|                                                | Fejér                  | 1.106 [1.015 - 1.204]    | 1.114 [1.023 - 1.214]    | 1.126 [1.036 - 1.224]    | 1.185 [1.099 - 1.277]    | 1.118 [1.031 - 1.213]    | 1.112 [1.021 - 1.210]    |
|                                                | Győr-Moson-Sopron      | 1.022 [0.937 - 1.116]    | 1.022 [0.936 - 1.117]    | 1.026 [0.941 - 1.119]    | 1.063 [0.983 - 1.149]    | 1.023 [0.941 - 1.113]    | 1.033 [0.947 - 1.127]    |
|                                                | Hajdú-Bihar            | 0.880 [0.809 - 0.956]    | 0.883 [0.812 - 0.960]    | 0.889 [0.819 - 0.966]    | 0.917 [0.851 - 0.988]    | 0.869 [0.802 - 0.941]    | 0.879 [0.809 - 0.955]    |
|                                                | Heves                  | 1.015 [0.926 - 1.113]    | 1.011 [0.921 - 1.109]    | 1.026 [0.937 - 1.124]    | 1.010 [0.929 - 1.098]    | 0.999 [0.915 - 1.092]    | 1.016 [0.927 - 1.114]    |
|                                                | Komárom-Esztergom      | 1.106 [1.004 - 1.219]    | 1.089 [0.988 - 1.202]    | 1.104 [1.004 - 1.215]    | 1.093 [1.000 - 1.193]    | 1.106 [1.008 - 1.214]    | 1.095 [0.994 - 1.206]    |
|                                                | Nógrád                 | 1.105 [0.997 - 1.225]    | 1.111 [1.002 - 1.232]    | 1.113 [1.005 - 1.233]    | 1.136 [1.035 - 1.248]    | 1.116 [1.011 - 1.233]    | 1.109 [1.000 - 1.229]    |
|                                                | Pest                   | 0.974 [0.912 - 1.041]    | 0.973 [0.911 - 1.040]    | 0.972 [0.910 - 1.037]    | 1.019 [0.961 - 1.081]    | 0.973 [0.913 - 1.036]    | 0.974 [0.912 - 1.040]    |
|                                                | Somogy                 | 0.971 [0.884 - 1.067]    | 0.975 [0.887 - 1.072]    | 0.977 [0.891 - 1.073]    | 0.977 [0.898 - 1.063]    | 1.002 [0.916 - 1.095]    | 0.979 [0.892 - 1.076]    |
|                                                | Szabolcs-Szatmár-Bereg | 1.080 [0.990 - 1.178]    | 1.084 [0.994 - 1.183]    | 1.093 [1.004 - 1.191]    | 1.102 [1.020 - 1.191]    | 1.070 [0.984 - 1.163]    | 1.080 [0.991 - 1.177]    |
|                                                | Jász-Nagykun-Szolnok   | 0.855 [0.782 - 0.935]    | 0.858 [0.785 - 0.939]    | 0.858 [0.785 - 0.937]    | 0.910 [0.840 - 0.985]    | 0.855 [0.785 - 0.932]    | 0.862 [0.789 - 0.943]    |
|                                                | Tolna                  | 0.958 [0.857 - 1.070]    | 0.961 [0.860 - 1.074]    | 0.959 [0.859 - 1.069]    | 0.980 [0.888 - 1.081]    | 0.936 [0.841 - 1.040]    | 0.962 [0.862 - 1.074]    |
|                                                | Vas                    | 0.996 [0.896 - 1.108]    | 0.994 [0.894 - 1.106]    | 1.002 [0.903 - 1.112]    | 1.051 [0.958 - 1.153]    | 1.013 [0.916 - 1.119]    | 0.992 [0.893 - 1.103]    |
|                                                | Veszprém               | 1.009 [0.920 - 1.106]    | 1.012 [0.923 - 1.109]    | 1.017 [0.930 - 1.113]    | 1.027 [0.947 - 1.115]    | 1.029 [0.944 - 1.122]    | 1.020 [0.932 - 1.117]    |
|                                                | Zala                   | 0.903 [0.815 - 1.001]    | 0.909 [0.821 - 1.008]    | 0.922 [0.834 - 1.019]    | 0.945 [0.864 - 1.034]    | 0.927 [0.842 - 1.021]    | 0.905 [0.818 - 1.002]    |
| Settlement type of GMP                         | Urban / Rural          | 0.987 [0.947 - 1.029]    | 0.985 [0.945 - 1.027]    | 0.979 [0.939 - 1.020]    | 0.972 [0.936 - 1.009]    | 0.992 [0.954 - 1.033]    | 0.989 [0.949 - 1.031]    |

|                                               |                    | AstraZeneca           | Janssen               | Moderna                      | Pfizer                       | Sinopharm                    | Sputnik               |
|-----------------------------------------------|--------------------|-----------------------|-----------------------|------------------------------|------------------------------|------------------------------|-----------------------|
| Size of GMP (reference 1201-1600 patients)    | ≤ 800 patients     | 1.028 [0.934 - 1.132] | 1.025 [0.931 - 1.129] | 1.036 [0.942 - 1.139]        | 0.997 [0.915 - 1.086]        | 1.022 [0.931 - 1.120]        | 1.029 [0.935 - 1.133] |
|                                               | 801-1200 patients  | 1.033 [0.984 - 1.084] | 1.035 [0.986 - 1.087] | 1.042 [0.994 - 1.093]        | 1.007 [0.964 - 1.051]        | 1.035 [0.989 - 1.084]        | 1.037 [0.988 - 1.088] |
|                                               | 1601-2000 patients | 1.017 [0.979 - 1.056] | 1.021 [0.983 - 1.060] | 1.021 [0.984 - 1.060]        | 1.014 [0.981 - 1.049]        | 1.016 [0.980 - 1.053]        | 1.019 [0.982 - 1.058] |
|                                               | > 2000 patients    | 1.019 [0.978 - 1.062] | 1.022 [0.981 - 1.066] | 1.025 [0.984 - 1.067]        | 1.018 [0.981 - 1.057]        | 1.014 [0.975 - 1.055]        | 1.025 [0.983 - 1.068] |
| Age and sex of GP (reference < 65 years male) | < 65 years female  | 0.984 [0.948 - 1.022] | 0.986 [0.949 - 1.024] | 0.986 [0.951 - 1.024]        | <b>0.963 [0.931 - 0.995]</b> | 0.984 [0.949 - 1.020]        | 0.984 [0.948 - 1.022] |
|                                               | ≥ 65 years male    | 1.027 [0.983 - 1.072] | 1.028 [0.985 - 1.074] | 1.026 [0.983 - 1.071]        | 0.997 [0.959 - 1.036]        | 1.032 [0.991 - 1.076]        | 1.028 [0.985 - 1.073] |
|                                               | ≥ 65 years female  | 0.993 [0.946 - 1.043] | 0.992 [0.944 - 1.041] | 0.985 [0.939 - 1.034]        | 0.950 [0.909 - 0.992]        | 0.993 [0.948 - 1.040]        | 0.993 [0.946 - 1.042] |
|                                               | Vacant             | 0.967 [0.909 - 1.027] | 0.966 [0.908 - 1.027] | 0.954 [0.898 - 1.014]        | <b>0.921 [0.871 - 0.974]</b> | 0.959 [0.904 - 1.017]        | 0.962 [0.905 - 1.022] |
| Relative education for GMP                    |                    | 0.674 [0.447 - 1.017] | 0.698 [0.462 - 1.054] | <b>0.648 [0.432 - 0.973]</b> | <b>0.596 [0.413 - 0.860]</b> | <b>0.606 [0.409 - 0.898]</b> | 0.693 [0.460 - 1.042] |
| Relative employment for GMP                   |                    | 0.911 [0.688 - 1.206] | 0.894 [0.675 - 1.184] | 0.919 [0.696 - 1.213]        | 0.911 [0.708 - 1.173]        | 0.910 [0.695 - 1.191]        | 0.882 [0.667 - 1.166] |



**Table S7.** Mortality risk reduction among vaccinated adults by Cox proportional hazards regression models between 21 June 2021 and 15 August 2021 (adjusted hazard ratios with corresponding 95% confidence intervals, significant results in bold) in Hungary.

|                                                |                        | AstraZeneca              | Janssen                  | Moderna                  | Pfizer                  | Sinopharm                | Sputnik                  |
|------------------------------------------------|------------------------|--------------------------|--------------------------|--------------------------|-------------------------|--------------------------|--------------------------|
| Vaccination                                    | Fully / Not vaccinated | 0.317 [0.294 - 0.341]    | 0.707 [0.604 - 0.828]    | 0.438 [0.409 - 0.469]    | 0.384 [0.370 - 0.399]   | 0.312 [0.297 - 0.328]    | 0.221 [0.202 - 0.242]    |
| Age in years                                   |                        | 1.092 [1.090 - 1.094]    | 1.092 [1.090 - 1.094]    | 1.092 [1.091 - 1.094]    | 1.095 [1.093 - 1.096]   | 1.094 [1.092 - 1.096]    | 1.092 [1.091 - 1.094]    |
| Sex                                            | Female / Male          | 0.579 [0.552 - 0.607]    | 0.582 [0.554 - 0.612]    | 0.597 [0.570 - 0.626]    | 0.608 [0.586 - 0.631]   | 0.589 [0.564 - 0.615]    | 0.574 [0.546 - 0.602]    |
| Exemption certificate                          | Yes / No               | 1.747 [1.603 - 1.905]    | 1.737 [1.585 - 1.904]    | 1.717 [1.576 - 1.872]    | 1.602 [1.498 - 1.713]   | 1.634 [1.507 - 1.773]    | 1.729 [1.580 - 1.893]    |
| Diabetes mellitus                              | Yes / No               | 1.329 [1.247 - 1.417]    | 1.297 [1.211 - 1.390]    | 1.340 [1.259 - 1.427]    | 1.349 [1.287 - 1.414]   | 1.327 [1.253 - 1.405]    | 1.340 [1.253 - 1.432]    |
| Ischemic heart disease                         | Yes / No               | 1.457 [1.342 - 1.582]    | 1.437 [1.316 - 1.568]    | 1.413 [1.303 - 1.532]    | 1.381 [1.300 - 1.466]   | 1.491 [1.386 - 1.605]    | 1.484 [1.363 - 1.616]    |
| COPD                                           | Yes / No               | 1.848 [1.705 - 2.003]    | 1.821 [1.672 - 1.984]    | 1.850 [1.709 - 2.001]    | 1.751 [1.648 - 1.861]   | 1.822 [1.692 - 1.962]    | 1.807 [1.660 - 1.965]    |
| Asthma                                         | Yes / No               | not computable           | 0.703 [0.099 - 5.001]    | not computable           | 0.427 [0.060 - 3.032]   | not computable           | not computable           |
| Hypertension                                   | Yes / No               | 1.088 [1.030 - 1.149]    | 1.086 [1.026 - 1.150]    | 1.064 [1.008 - 1.123]    | 0.994 [0.951 - 1.039]   | 1.044 [0.992 - 1.098]    | 1.079 [1.021 - 1.140]    |
| Cancer                                         | Yes / No               | 4.907 [4.603 - 5.232]    | 5.273 [4.931 - 5.639]    | 4.563 [4.283 - 4.862]    | 3.466 [3.302 - 3.638]   | 4.133 [3.892 - 4.389]    | 5.111 [4.783 - 5.463]    |
| Chronic liver disease                          | Yes / No               | 16.457 [12.052 - 22.471] | 17.440 [12.668 - 24.011] | 15.849 [11.563 - 21.724] | 12.672 [9.593 - 16.739] | 19.799 [15.065 - 26.022] | 16.569 [11.933 - 23.007] |
| End-stage renal disease                        | Yes / No               | 3.668 [2.935 - 4.584]    | 3.293 [2.561 - 4.235]    | 3.374 [2.718 - 4.189]    | 3.426 [2.975 - 3.946]   | 3.491 [2.820 - 4.322]    | 3.304 [2.570 - 4.248]    |
| Location of GMP by county (reference Budapest) | Baranya                | 0.828 [0.717 - 0.957]    | 0.830 [0.713 - 0.966]    | 0.824 [0.714 - 0.951]    | 0.872 [0.782 - 0.973]   | 0.848 [0.744 - 0.965]    | 0.840 [0.725 - 0.974]    |
|                                                | Bács-Kiskun            | 0.901 [0.792 - 1.025]    | 0.917 [0.801 - 1.048]    | 0.924 [0.815 - 1.047]    | 0.953 [0.862 - 1.053]   | 0.885 [0.787 - 0.996]    | 0.907 [0.796 - 1.034]    |
|                                                | Békés                  | 0.841 [0.730 - 0.970]    | 0.821 [0.707 - 0.954]    | 0.835 [0.725 - 0.961]    | 0.982 [0.882 - 1.093]   | 0.829 [0.728 - 0.945]    | 0.845 [0.732 - 0.976]    |
|                                                | Borsod-Abaúj-Zemplén   | 0.938 [0.830 - 1.059]    | 0.929 [0.817 - 1.057]    | 0.932 [0.826 - 1.052]    | 1.006 [0.913 - 1.108]   | 0.905 [0.808 - 1.013]    | 0.935 [0.825 - 1.059]    |
|                                                | Csongrád-Csanád        | 0.911 [0.798 - 1.040]    | 0.929 [0.810 - 1.066]    | 0.930 [0.815 - 1.062]    | 0.987 [0.893 - 1.092]   | 0.898 [0.796 - 1.013]    | 0.919 [0.804 - 1.051]    |
|                                                | Fejér                  | 0.888 [0.770 - 1.025]    | 0.924 [0.795 - 1.074]    | 0.938 [0.816 - 1.078]    | 0.977 [0.876 - 1.089]   | 0.917 [0.806 - 1.044]    | 0.930 [0.805 - 1.075]    |
|                                                | Győr-Moson-Sopron      | 1.072 [0.935 - 1.229]    | 1.097 [0.949 - 1.268]    | 1.075 [0.938 - 1.232]    | 1.089 [0.979 - 1.212]   | 1.032 [0.910 - 1.170]    | 1.053 [0.914 - 1.212]    |
|                                                | Hajdú-Bihar            | 0.829 [0.727 - 0.944]    | 0.854 [0.746 - 0.978]    | 0.858 [0.754 - 0.975]    | 0.867 [0.783 - 0.961]   | 0.841 [0.746 - 0.947]    | 0.859 [0.753 - 0.981]    |
|                                                | Heves                  | 0.910 [0.784 - 1.055]    | 0.922 [0.789 - 1.078]    | 0.941 [0.813 - 1.088]    | 0.945 [0.842 - 1.061]   | 0.870 [0.758 - 0.997]    | 0.910 [0.782 - 1.060]    |
|                                                | Komárom-Esztergom      | 0.948 [0.808 - 1.112]    | 0.906 [0.762 - 1.076]    | 0.902 [0.768 - 1.058]    | 1.021 [0.902 - 1.156]   | 0.885 [0.763 - 1.026]    | 0.953 [0.810 - 1.121]    |
|                                                | Nógrád                 | 0.874 [0.733 - 1.041]    | 0.912 [0.762 - 1.091]    | 0.900 [0.758 - 1.069]    | 0.980 [0.857 - 1.120]   | 0.885 [0.753 - 1.040]    | 0.909 [0.762 - 1.085]    |
|                                                | Pest                   | 0.977 [0.880 - 1.085]    | 1.024 [0.917 - 1.142]    | 1.014 [0.916 - 1.122]    | 1.042 [0.962 - 1.128]   | 0.945 [0.860 - 1.038]    | 0.990 [0.890 - 1.102]    |
|                                                | Somogy                 | 0.973 [0.840 - 1.127]    | 0.982 [0.842 - 1.147]    | 0.966 [0.834 - 1.118]    | 1.014 [0.905 - 1.136]   | 0.996 [0.872 - 1.138]    | 0.948 [0.815 - 1.103]    |
|                                                | Szabolcs-Szatmár-Bereg | 0.859 [0.745 - 0.991]    | 0.906 [0.782 - 1.050]    | 0.927 [0.808 - 1.065]    | 0.960 [0.861 - 1.070]   | 0.896 [0.788 - 1.020]    | 0.903 [0.783 - 1.042]    |
|                                                | Jász-Nagykun-Szolnok   | 0.985 [0.863 - 1.124]    | 1.002 [0.874 - 1.150]    | 1.042 [0.917 - 1.185]    | 1.013 [0.912 - 1.125]   | 0.948 [0.839 - 1.070]    | 1.003 [0.877 - 1.147]    |
|                                                | Tolna                  | 0.920 [0.774 - 1.094]    | 0.926 [0.772 - 1.111]    | 0.972 [0.822 - 1.148]    | 0.999 [0.878 - 1.137]   | 0.883 [0.755 - 1.033]    | 0.886 [0.741 - 1.060]    |
|                                                | Vas                    | 0.907 [0.765 - 1.076]    | 0.929 [0.777 - 1.111]    | 0.911 [0.770 - 1.078]    | 0.976 [0.858 - 1.110]   | 0.931 [0.800 - 1.083]    | 0.936 [0.788 - 1.111]    |
|                                                | Veszprém               | 0.882 [0.759 - 1.024]    | 0.867 [0.740 - 1.016]    | 0.867 [0.748 - 1.005]    | 0.971 [0.866 - 1.088]   | 0.829 [0.722 - 0.951]    | 0.841 [0.720 - 0.981]    |
|                                                | Zala                   | 0.776 [0.658 - 0.916]    | 0.793 [0.667 - 0.944]    | 0.826 [0.703 - 0.971]    | 0.877 [0.774 - 0.992]   | 0.813 [0.701 - 0.942]    | 0.805 [0.681 - 0.951]    |
| Size of GMP (reference 1201-1600 pa-           | ≤ 800 patients         | 0.942 [0.809 - 1.098]    | 0.944 [0.807 - 1.105]    | 0.949 [0.817 - 1.101]    | 0.945 [0.841 - 1.062]   | 1.030 [0.900 - 1.178]    | 0.998 [0.858 - 1.161]    |
|                                                | 801-1200 patients      | 0.985 [0.912 - 1.063]    | 0.965 [0.891 - 1.045]    | 0.955 [0.885 - 1.031]    | 0.996 [0.939 - 1.056]   | 0.990 [0.924 - 1.062]    | 0.990 [0.916 - 1.070]    |

|                                                  |                    | AstraZeneca           | Janssen               | Moderna                      | Pfizer                       | Sinopharm                    | Sputnik               |
|--------------------------------------------------|--------------------|-----------------------|-----------------------|------------------------------|------------------------------|------------------------------|-----------------------|
| tients)                                          | 1601-2000 patients | 1.004 [0.945 - 1.066] | 0.994 [0.933 - 1.058] | 0.992 [0.935 - 1.052]        | 0.987 [0.941 - 1.034]        | 0.987 [0.934 - 1.044]        | 1.002 [0.942 - 1.065] |
|                                                  | > 2000 patients    | 1.004 [0.940 - 1.073] | 0.992 [0.926 - 1.063] | 0.990 [0.928 - 1.056]        | 1.022 [0.971 - 1.076]        | 1.030 [0.970 - 1.094]        | 0.996 [0.931 - 1.065] |
| Settlement type of GMP                           | Urban / Rural      | 0.982 [0.919 - 1.049] | 1.000 [0.933 - 1.072] | 0.981 [0.919 - 1.048]        | 0.980 [0.931 - 1.033]        | 0.987 [0.929 - 1.049]        | 0.995 [0.930 - 1.065] |
| Age and sex of GP<br>(reference < 65 years male) | < 65 years female  | 0.974 [0.918 - 1.034] | 0.981 [0.922 - 1.045] | 0.980 [0.924 - 1.039]        | 0.977 [0.933 - 1.023]        | 0.972 [0.920 - 1.027]        | 0.974 [0.916 - 1.035] |
|                                                  | ≥ 65 years male    | 0.967 [0.902 - 1.037] | 0.975 [0.906 - 1.049] | 0.986 [0.920 - 1.056]        | 0.960 [0.909 - 1.014]        | 0.978 [0.917 - 1.042]        | 0.990 [0.922 - 1.063] |
|                                                  | ≥ 65 years female  | 0.979 [0.905 - 1.058] | 1.001 [0.923 - 1.086] | 0.988 [0.915 - 1.066]        | 0.964 [0.908 - 1.024]        | 0.982 [0.914 - 1.054]        | 1.014 [0.937 - 1.097] |
|                                                  | Vacant             | 1.066 [0.971 - 1.170] | 1.060 [0.962 - 1.167] | 1.032 [0.940 - 1.133]        | 0.972 [0.901 - 1.048]        | 1.074 [0.985 - 1.171]        | 1.048 [0.952 - 1.153] |
| Relative education for GMP                       |                    | 0.623 [0.325 - 1.197] | 0.651 [0.329 - 1.288] | <b>0.463 [0.242 - 0.884]</b> | <b>0.434 [0.261 - 0.723]</b> | <b>0.484 [0.265 - 0.883]</b> | 0.596 [0.306 - 1.160] |
| Relative employment for GMP                      |                    | 0.781 [0.503 - 1.212] | 0.760 [0.481 - 1.201] | 0.832 [0.537 - 1.288]        | 0.807 [0.569 - 1.144]        | 0.861 [0.572 - 1.295]        | 0.779 [0.498 - 1.220] |
